# Supplementary material for: Accumulation Dynamics of Defective Genomes during Experimental Evolution of Two Betacoronaviruses
Source: MDPI journal article supplement (doi:10.3390/v16040644), 2024-04-20
Supplement: s1 [file s1]

**Table S2.** Fitting of viral load data to the best-fitting ARIMA( $p, d, q$ )<sup>1</sup> model based on the minimum BIC criterium. Errors represent  $\pm 1$  SE.

| Virus     | Cells   | MOI  | Lineage | ARIMA   | BIC    | Intercept          | Slope                  | Moving average    | Autocorrelation 1  | Autocorrelation 2 |
|-----------|---------|------|---------|---------|--------|--------------------|------------------------|-------------------|--------------------|-------------------|
| HCoV-OC43 | BHK-21  | High | 1       | 0, 0, 1 | 64.54  | 8.717 $\pm$ 0.143  | 0.015 $\pm$ 0.005      | 0.319 $\pm$ 0.118 |                    |                   |
|           |         |      | 2       | 1, 0, 0 | 142.25 | 11.779 $\pm$ 0.386 | 0.025 $\pm$ 0.013      |                   | 0.394 $\pm$ 0.138  |                   |
|           |         |      | 3       | 0, 0, 0 | 232.22 | 18.415 $\pm$ 0.612 | 0.041 $\pm$ 0.022      |                   |                    |                   |
|           |         | Low  | 1       | 1, 0, 0 | 546.11 |                    | -0.820 $\pm$ 1.228     |                   | 0.821 $\pm$ 0.076  |                   |
|           |         |      | 2       | 2, 0, 1 | 143.65 | 13.336 $\pm$ 0.465 | 0.017 $\pm$ 0.016      | 0.565 $\pm$ 0.161 | -0.302 $\pm$ 0.176 | 0.565 $\pm$ 0.136 |
|           |         |      | 3       | 2, 0, 0 | 243.91 | 18.850 $\pm$ 1.352 | 0.043 $\pm$ 1.346      |                   | 0.268 $\pm$ 0.268  | 0.284 $\pm$ 0.146 |
|           | HCT-8   | High | 1       | 0, 0, 0 | 631.98 |                    | -48.459 $\pm$ 1.346    |                   |                    |                   |
|           |         |      | 2       | 0, 0, 0 | 104.77 | 14.737 $\pm$ 0.365 | -0.097 $\pm$ 0.020     |                   |                    |                   |
|           |         |      | 3       | 0, 0, 0 | -22.13 | 6.895 $\pm$ 0.050  | -0.018 $\pm$ 0.003     |                   |                    |                   |
|           |         | Low  | 1       | 0, 0, 1 | 640.54 |                    | -635.858 $\pm$ 74.643  | 0.720 $\pm$ 0.137 |                    |                   |
|           |         |      | 2       | 1, 0, 0 | 346.36 |                    | -6.764 $\pm$ 0.807     |                   | 0.462 $\pm$ 0.462  |                   |
|           |         |      | 3       | 2, 0, 0 | 374.66 |                    | -4.469 $\pm$ 2.255     |                   | 0.425 $\pm$ 0.425  | 0.335 $\pm$ 0.183 |
| MHV       | CCL-9.1 | High | 1       | 0, 0, 0 | 66.58  | 7.8304 $\pm$ 0.367 | -0.036 $\pm$ 0.030     |                   |                    |                   |
|           |         |      | 2       | 0, 0, 0 | 33.85  | 5.584 $\pm$ 0.174  | 0.007 $\pm$ 0.014      |                   |                    |                   |
|           |         |      | 3       | 0, 0, 0 | -15.11 | 3.793 $\pm$ 0.002  | 0.057 $\pm$ 0.005      |                   |                    |                   |
|           |         | Low  | 1       | 1, 0, 0 | 446.34 |                    | -789.109 $\pm$ 330.142 | 0.781 $\pm$ 0.130 |                    |                   |
|           |         |      | 2       | 1, 0, 0 | 446.46 |                    | -697.742 $\pm$ 338.711 | 0.774 $\pm$ 0.142 |                    |                   |
|           |         |      | 3       | 1, 0, 0 | 446.15 |                    | -866.648 $\pm$ 317.089 | 0.779 $\pm$ 0.125 |                    |                   |

<sup>1</sup>ARIMA parameters:  $p \geq 0$ : order of the autoregressive model (number of time lags);  $d \geq 0$ : is the differencing order;  $q \geq 0$ : order of the moving-average model.
