# Supplementary material for: Accumulation Dynamics of Defective Genomes during Experimental Evolution of Two Betacoronaviruses
Source: MDPI journal article supplement (doi:10.3390/v16040644), 2024-04-20
Supplement: s1 [file s1]

**Table S1.** Statistics describing the variation in MOI for each experimental evolution lineage. Median values  $\pm$ IQR are shown. Last column shows the fold difference between high and low MOIs (averaging lineages).

| Virus     | Cells   | Lineage | Low MOI                                       | High MOI                                      | Log <sub>2</sub> -fold |
|-----------|---------|---------|-----------------------------------------------|-----------------------------------------------|------------------------|
| HCoV-OC43 | BHK-21  | 1       | $3.74 \times 10^{-4} \pm 2.50 \times 10^{-2}$ | $21.25 \pm 82.13$                             | 16.0                   |
|           |         | 2       | $7.13 \times 10^{-4} \pm 2.50 \times 10^{-2}$ | $31.25 \pm 208.50$                            |                        |
|           |         | 3       | $1.50 \times 10^{-4} \pm 1.56 \times 10^{-2}$ | $25.00 \pm 145.75$                            |                        |
|           | HTC-8   | 1       | $5.81 \times 10^{-5} \pm 2.50 \times 10^{-3}$ | $0.88 \pm 4.76$                               | 12.6                   |
|           |         | 2       | $1.21 \times 10^{-4} \pm 3.37 \times 10^{-3}$ | $0.63 \pm 2.22$                               |                        |
|           |         | 3       | $3.00 \times 10^{-3} \pm 2.96 \times 10^{-3}$ | $0.75 \pm 5.07$                               |                        |
| MHV       | CCL-9.1 | 1       | $2.65 \times 10^{-6} \pm 8.26 \times 10^{-6}$ | $6.96 \times 10^{-3} \pm 0.28$                | 12.0                   |
|           |         | 2       | $2.59 \times 10^{-6} \pm 1.79 \times 10^{-5}$ | $1.06 \times 10^{-2} \pm 9.02 \times 10^{-2}$ |                        |
|           |         | 3       | $8.69 \times 10^{-6} \pm 1.10 \times 10^{-4}$ | $1.09 \times 10^{-2} \pm 6.62 \times 10^{-2}$ |                        |
