# Supplementary figures and images for: Accumulation Dynamics of Defective Genomes during Experimental Evolution of Two Betacoronaviruses
Source: MDPI journal article supplement (doi:10.3390/v16040644), 2024-04-20

### HCoV-OC43 BHK-21

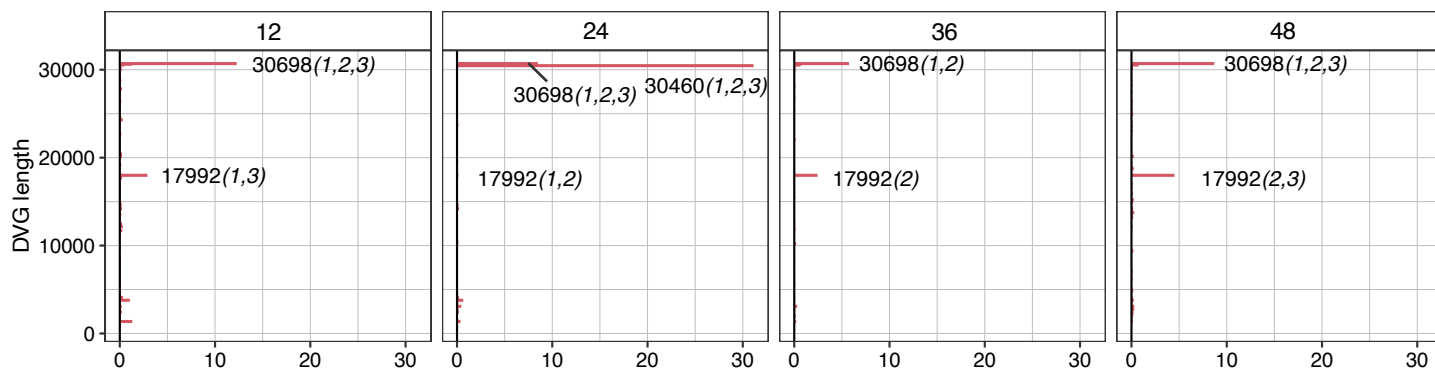

### HCoV-OC43 HCT-8

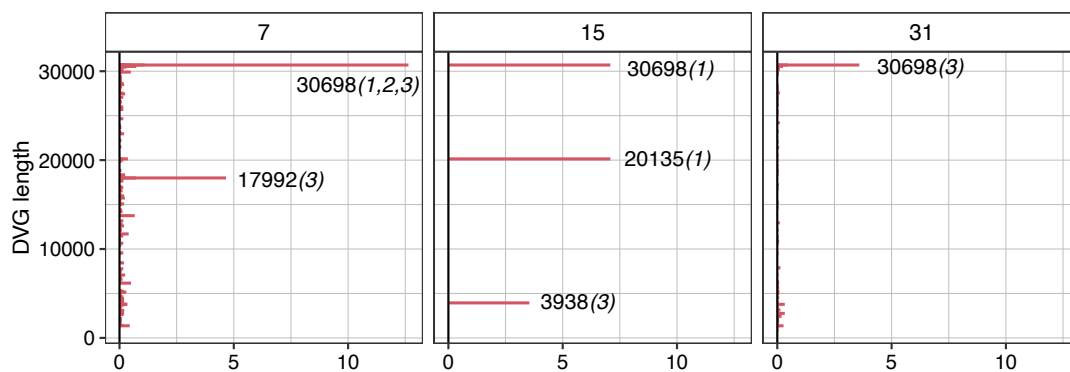

### MHV CCL-9.1

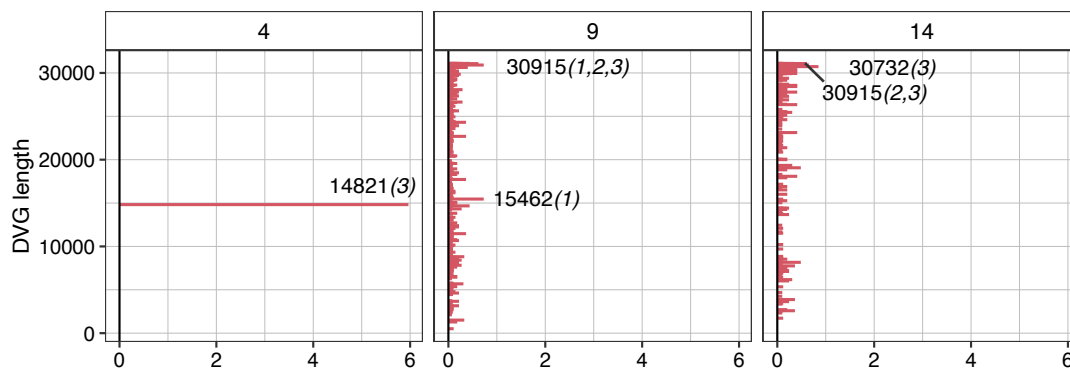

Abundance (sum RPHT)

Supplement: s1 [file s1]

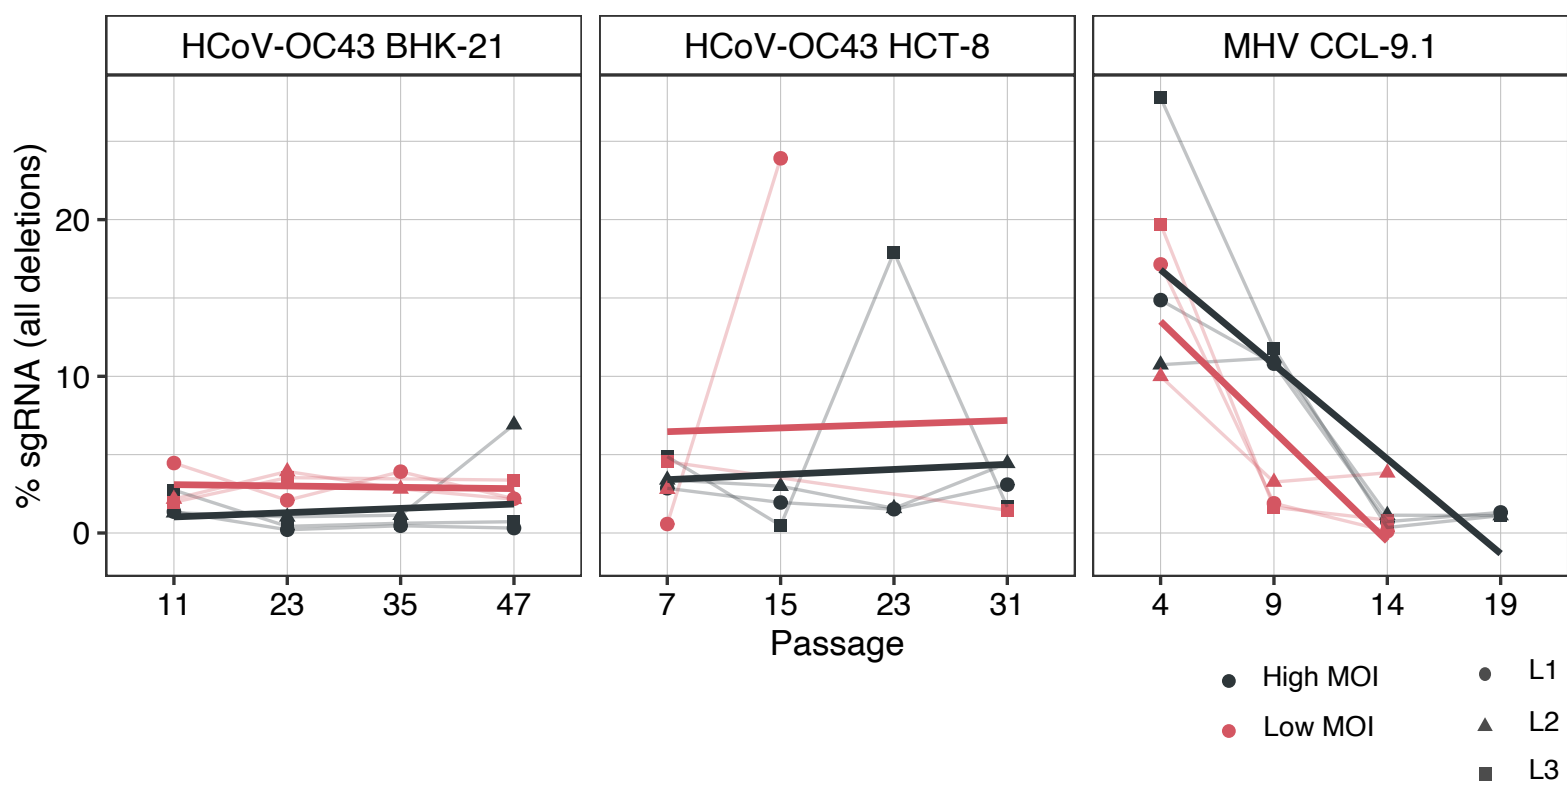

Supplement: s1 [file s1]
